# Supplementary material
Source: publisher site journal article supplement (https://www.dovepress.com/article/346951)

## Supplementary material

### **Figure S1: Quantitative questionnaire**

**Makerere University School of Public Health**

**PI: Bbuye Mudarshiru**

**Study Title: Linkage to HIV care among Adults with positive HIV oral self-testing results. A mixed-methods study**

Quantitative questionnaire

| <b><u>Section 1: Demographic background</u></b><br><i>In this section, I will first ask you questions about yourself.</i> |                                                                                                                                                                                                                       |
|---------------------------------------------------------------------------------------------------------------------------|-----------------------------------------------------------------------------------------------------------------------------------------------------------------------------------------------------------------------|
| Name: _____                                                                                                               |                                                                                                                                                                                                                       |
| Sex: _____                                                                                                                | Age: _____                                                                                                                                                                                                            |
| 1.                                                                                                                        | What is the name of the town, division, parish and village where you currently live?                                                                                                                                  |
| 2.                                                                                                                        | What is the highest level of school/class you have completed?<br>1= No formal education<br>2= Primary<br>3= Secondary/Vocational<br>4=University/Higher institution                                                   |
| 3.                                                                                                                        | Can you read? 1 = Yes, 2 = No                                                                                                                                                                                         |
| 4.                                                                                                                        | Can you write? 1 = Yes, 2 = No                                                                                                                                                                                        |
| 5.                                                                                                                        | What is your tribe?<br>01 = Ganda, 02 = Kiga\nkole, 03 = Nyoro\Toro, 04 = Soga,<br>05 = Gisu, 06 = Teso, 07 = Acholi\Langi, 08 = Japadhola,<br>09 = Lugbara, 10 = Karamajong, 11 = Mufumbira,<br>12 = Other (Specify) |
| 6.                                                                                                                        | What is your religion?<br>1 = Anglican (Church of Uganda), 2 = Catholic,<br>3 = Seventh Day Adventist, 4 = Saved/Pentecostal,<br>5 = Moslem, 6 = None, 7 = Other                                                      |
| 7.                                                                                                                        | What is your current employment status<br>1= Employed for wages<br>2= Self-employed<br>3= Business partnership<br>4= Student<br>5= Out of work (Unemployed)<br>6= Housewife<br>7= Retired<br>8= Others                |
| 8.                                                                                                                        | What is your current marital status?<br>1 = Married, 2 = Cohabiting, 3 = Single (never married),<br>4 = Separated/ Divorced, 5 = Widowed                                                                              |

Version 1: November 2019

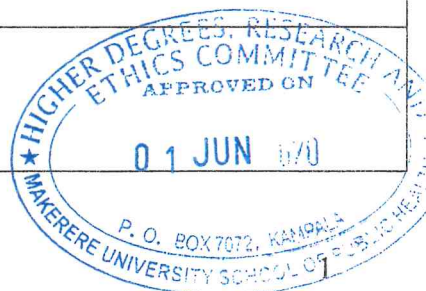

**Makerere University School of Public Health**  
**PI: Bbuye Mudarshiru**

|                                                                                                        |                                                                                                                                                                              |
|--------------------------------------------------------------------------------------------------------|------------------------------------------------------------------------------------------------------------------------------------------------------------------------------|
| 9.                                                                                                     | Do you have children?<br>1 = Yes, 2 = No                                                                                                                                     |
| 10.                                                                                                    | If yes, how many children do you have?                                                                                                                                       |
| 11.                                                                                                    | Are you a caregiver to others apart from your biological children?<br>1=Yes, 2=No                                                                                            |
| 12.                                                                                                    | Do you normally work throughout the year, seasonally, or only once in a while?<br>1 = Throughout the year, 2 = Seasonally,<br>3 = Once in a while                            |
| 13.                                                                                                    | From what sources do you get income?<br>1=Paid work, 2=Selling goods, 3=From Spouse,<br>4=From relatives, 5=Loans, 6=Other                                                   |
| 14.                                                                                                    | From all sources in the last month, how much money did you make in (in Uganda shillings)?<br>1=<50,000/=, 2=50-100,000/=, 3=100-350,000/=,<br>4=350-500,000/=, 5=>500,000/=  |
| 15.                                                                                                    | What is the main source of drinking water for members of your household?<br>1= Piped water<br>2= Dug Well<br>3= Borehole<br>4= River<br>5= Rain Water<br>6= Bottled Water    |
| 16.                                                                                                    | Does your household have<br>1= Electricity from a wire<br>2= Solar panels<br>3= Generator<br>4= Radio<br>5= Television<br>6= Refrigerator<br>7= A telephone/mobile telephone |
| 17.                                                                                                    | Does any member of your household own:<br>1= Bicycle<br>2= Motorcycle<br>3= Car or truck<br>4= Cows<br>5= None                                                               |
| <b>Section 2: Health related factors</b>                                                               |                                                                                                                                                                              |
| <b>In this section, I will ask you about your health, HIV status, and use of HIV oral self-testing</b> |                                                                                                                                                                              |
| 18.                                                                                                    | How do you rate your health status now<br>1=Poor health, 2=Good health, 3=excellent health                                                                                   |
| 19.                                                                                                    | Do you consume alcohol<br>1=Yes<br>2=No                                                                                                                                      |

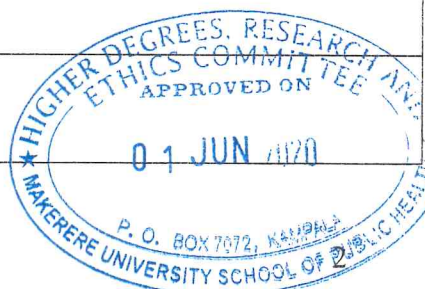

**Makerere University School of Public Health**  
**PI: Bbuye Mudarshiru**

|     |                                                                                                                                                                        |
|-----|------------------------------------------------------------------------------------------------------------------------------------------------------------------------|
| 20. | If yes, how often do you take alcohol<br>1=Everyday, 2=Twice a week, 3=once weekly, 4=once a month                                                                     |
| 21. | Who usually makes decisions about health care for yourself<br>1= Myself<br>2= Partner<br>3= Myself and my partner<br>4= My parents/guardian<br>5= Others specify _____ |
| 22. | Have you ever been tested for HIV before using HIV oral self-testing or other tests?<br>1= Yes, 2= No                                                                  |
| 23. | Are you willing to tell me your HIV test result you got when you used HIV oral self-testing?<br>1= Yes<br>2= No                                                        |
| 24. | If yes, what was the result of HIV oral self-test?<br>1= Positive<br>2= Negative<br>3= Indeterminate<br>4= I did not receive result                                    |
| 25. | Do you have any second thoughts of being HIV positive (denial)?<br>1=Yes<br>2=No                                                                                       |
| 26. | Did you go to the health facility for a confirmatory test?<br>1= Yes<br>2= No                                                                                          |
| 27. | How soon, did you go for a confirmatory test?<br>1=Same day<br>2=Within the first week<br>3=>week<br>4=Do not remember                                                 |
| 28. | What was your confirmatory HIV test result?<br>1= Positive<br>2= Negative<br>3= Indeterminate<br>4= I didn't get the results                                           |
| 29. | Did you feel at all guilty that you have HIV<br>1=Yes<br>2=No                                                                                                          |
| 30. | Do you feel at all ashamed that you have HIV<br>1=Yes<br>2=No                                                                                                          |
| 31. | Did you receive counselling about HIV at the facility?<br>1=Yes<br>2=No                                                                                                |
| 32. | Have you disclosed your HIV status to your partner?<br>1= Yes<br>2= No                                                                                                 |

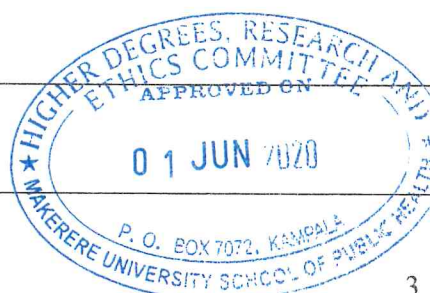



**Makerere University School of Public Health**  
**PI: Bbuye Mudarshiru**

|     |                                                                                                                                                                                                                            |
|-----|----------------------------------------------------------------------------------------------------------------------------------------------------------------------------------------------------------------------------|
|     | 3= I don't want to                                                                                                                                                                                                         |
| 33. | Have you disclosed your HIV status to any other person among your family or friends?<br>1= Yes<br>2= No<br>3= I don't want to                                                                                              |
| 34. | How likely was it that you disclosing your HIV status would result in being treated unfairly or badly by partner or your family members and friends<br>1=Not likely<br>2=Somehow likely<br>3=Very likely<br>4=I don't know |
| 35. | Can you recommend HIV oral self-testing to your partner or any other person?<br>1=Yes<br>2=No<br>3=I don't know                                                                                                            |
| 36. | If your HIV status is positive, how ready were you to start ART medication?<br>1=Very ready<br>2=Ready<br>3=Not ready                                                                                                      |
| 37. | Have you registered in a clinic for HIV care?(if yes, see HIV card no)<br>1=Yes<br>2=No                                                                                                                                    |
| 38. | Are you currently on antiretroviral therapy?<br>1= Yes<br>2= No                                                                                                                                                            |
| 39. | IF 27=yes, how long ago (months) did you start taking ARVs to manage your HIV?                                                                                                                                             |
| 40. | Do you have anyone taking HIV treatment in your home?<br>1=Yes<br>2=No<br>3=I don't know                                                                                                                                   |
| 41. | Did you know of any side effects caused by ART effect on those taking the medication<br><br>1=Yes<br>2=No<br>3=I don't know                                                                                                |
| 42. | Did you think you are likely to get side effects when you start taking ART medication<br>1=Not likely<br>2=Somewhat likely<br>3=Very likely<br>4=I don't know                                                              |
| 43. | Are there any other diseases bothering you in the last six months?<br>1=Tuberculosis<br>2=Malaria                                                                                                                          |

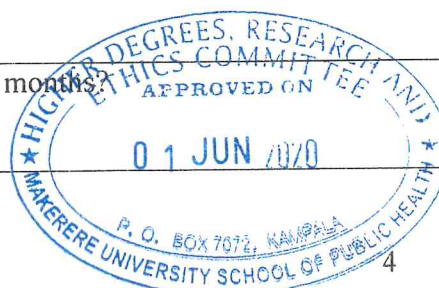

**Makerere University School of Public Health**  
**PI: Bbuye Mudarshiru**

|                                      |                                                                                                                                                                                                                                          |
|--------------------------------------|------------------------------------------------------------------------------------------------------------------------------------------------------------------------------------------------------------------------------------------|
|                                      | 3=Sexually transmitted diseases<br>4=Any non-communicable disease(Cancer, diabetes, hypertension)                                                                                                                                        |
| <b>Section 3: Structural factors</b> |                                                                                                                                                                                                                                          |
| 44.                                  | How long (in minutes) does it take you to travel to this hospital?                                                                                                                                                                       |
| 45.                                  | What is your primary means of transportation to the clinic? Please choose only one.<br>1 = Walking, 2 = Bicycle, 3 = Boda-Boda,<br>4 = Taxi (Matatu), 5 = Public bus, 6 = Special hire taxi,<br>7 = Privately owned car, 8 = Other _____ |
| 46.                                  | How much do you spend as transport to come to the health facility?<br>1= less than 5000/=<br>2= Within 6000 to 15000/=<br>3= Within 16000 to 35000/=<br>4= more than 35000/=                                                             |
| 47.                                  | How do you rate the general services offered at this facility?<br>1=Very good<br>2=Good<br>3=Not good<br>4=Poor                                                                                                                          |

**1. Interviewer details**

Name ..... Signature .....

Date of interview.....

**2. Reviewed by: ..... Signature .....**

Date of review.....

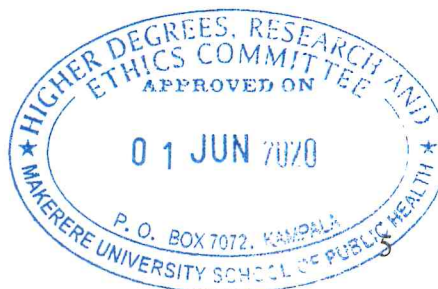

Supplement: Supplementary file 1 [file get_supplementary_file.php]
